# Supplementary material for: Zika Virus Infection Disrupts Astrocytic Proteins Involved in Synapse Control and Axon Guidance
Source: PubMed Central journal article supplement (PMC6448030; doi:10.3389/fmicb.2019.00596), 2019-03-26

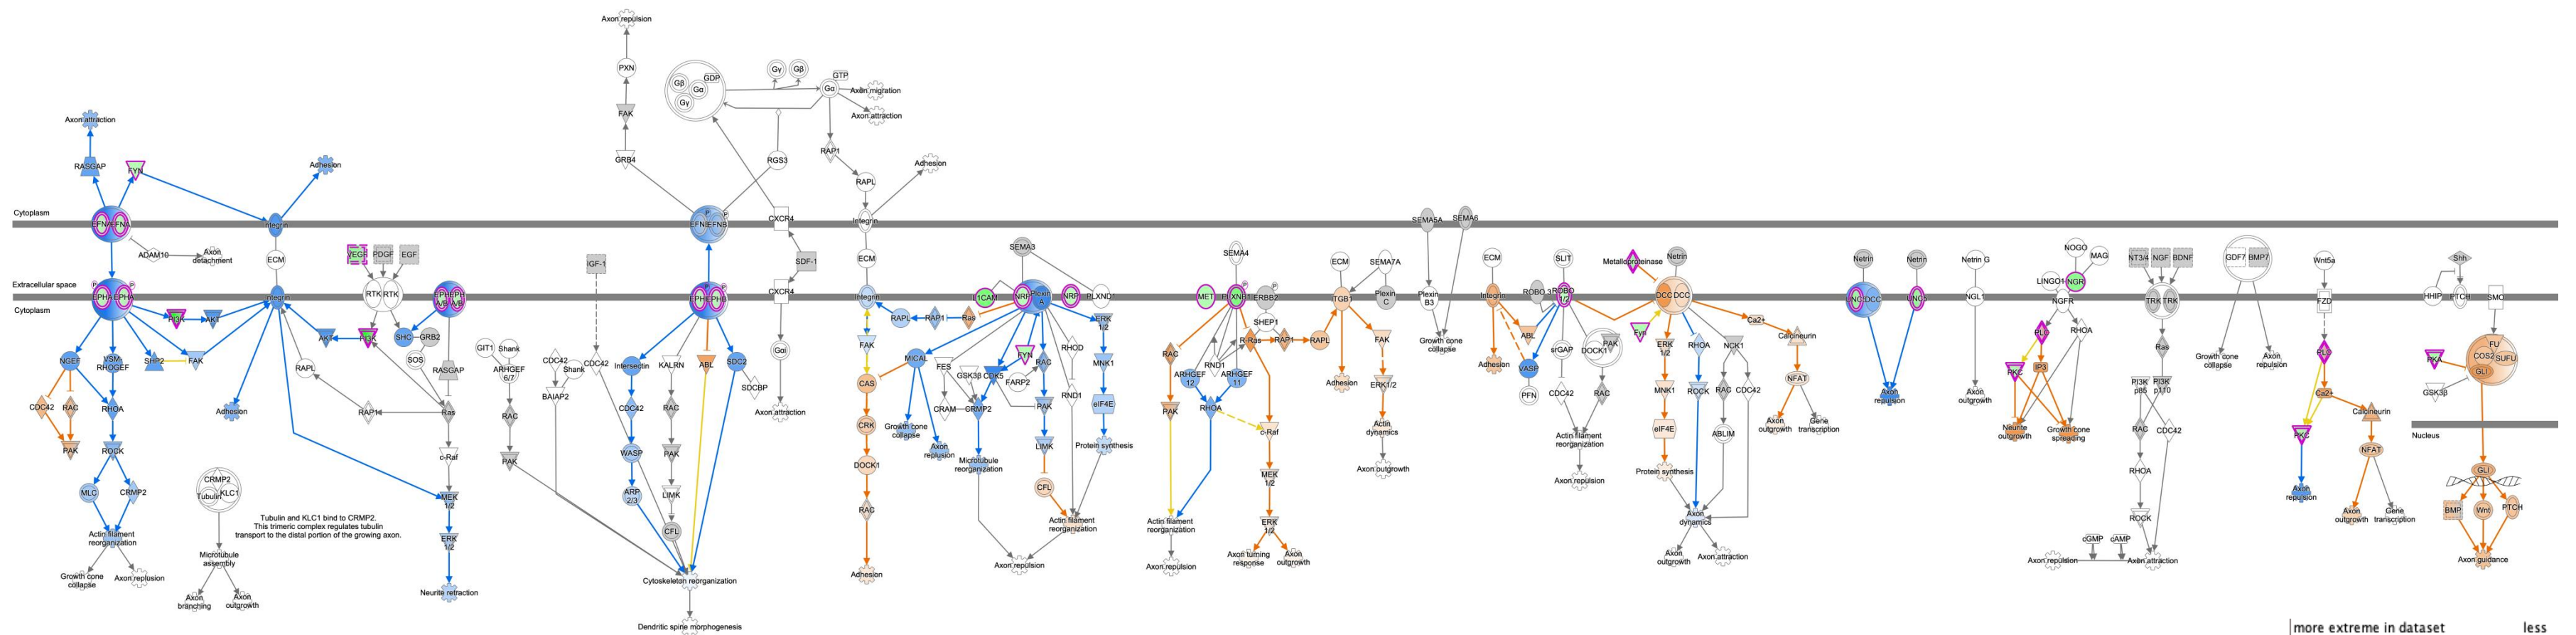

**Supplementary Figure 3. The Axonal Guidance Canonical Pathway.** Significantly differentially expressed U-251 proteins are indicated. Color coding is indicated in legend at right; white: proteins known to be in pathway, but not covered by SOMAScan panel.

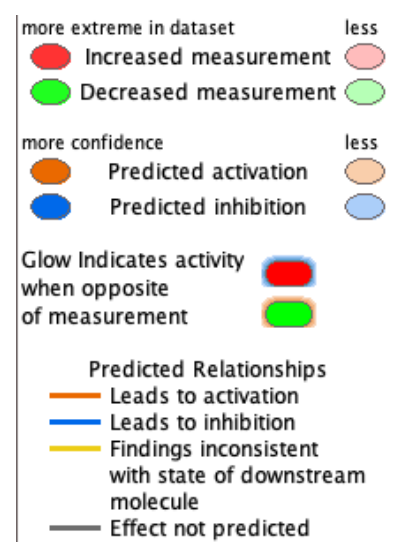

Supplement: Image_3.pdf [file Image_3.pdf]
